# Supplementary material for: Methodology and Characterization of a 3D Bone Organoid Model Derived from Murine Cells
Source: MDPI journal article supplement (doi:10.3390/ijms25084225), 2024-04-11
Supplement: s1 [file s1]

Supplementary Figure 1. Qualitative Assessment of Relative Gene Expression from 3D-mcBOM

Relative gene expression was evaluated 3D-mcBOM for relevant osteoblastogenic and osteoclastogenic genes at different times points relative to undifferentiated control from pooled cultures at Day 35.

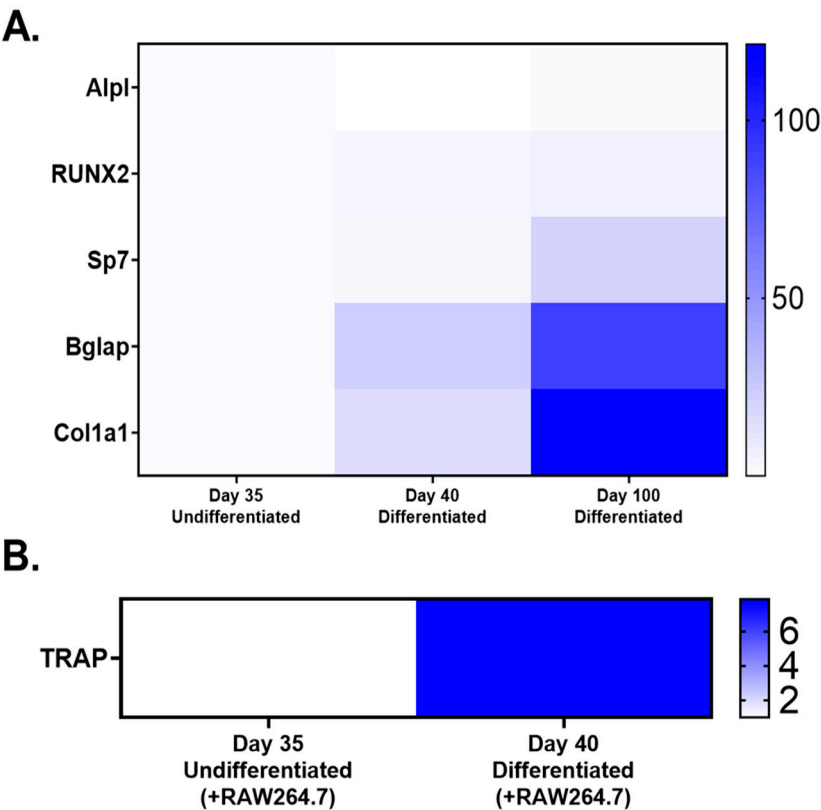

Supplementary Figure 2: Cell Viability and Protein Content  
 Cell viability (A) and total protein concentration (B) from 3D-mcBOM (OB+) or MC3T3-E1 cells in Matrigel (OB-) at Day 35. A pooled ratio of OB+/OB- conditions was calculated by multiplying the individual ratios for cell viability and protein concentration.

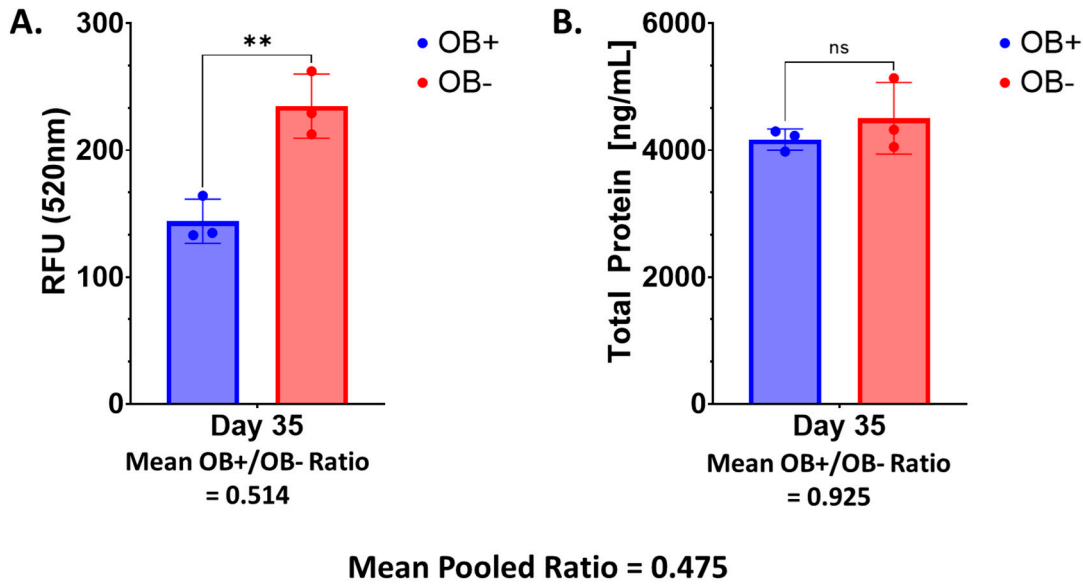

Supplementary Table 1: Summary of Experimental Outcomes for Major Components of 3D-mcBOM

| Day   | Process            | Bone Composition & Structure                                                                         | Osteoblast Function                                                                                   | Osteoclast Function                                       |
|-------|--------------------|------------------------------------------------------------------------------------------------------|-------------------------------------------------------------------------------------------------------|-----------------------------------------------------------|
| 1-34  | Osteoblastogenesis | Collagen Mineralization, Calcium Deposition (Fig3)                                                   | Hydroxyapatite quantification<br>Osteocalcin quantification (Fig 5&8)                                 | No Cathepsin K expression (Fig 3)                         |
| 35-42 | Osteoclastogenesis | Collagen Mineralization, Calcium Deposition (Fig 3)                                                  | Collagen Mineralization, Calcium Deposition, Collagen1a1 expression, ALPL analysis (Fig 3, 6-7, 9-11) | Cathepsin K expression, CTX-1 analysis (Fig 3, 6-7, 9-11) |
| 42+   | Bone Homeostasis   | Collagen Mineralization, Calcium Deposition, FTIR analysis, FITC microstructure analysis (Fig 3 & 4) | Collagen Mineralization, Calcium Deposition, Colla1 expression, ALPL analysis (Fig 3, 6-7, 9-11)      | Cathepsin K expression, CTX-1 analysis (Fig 3, 6-7, 9-11) |
